# Supplementary material
Source: HighWire-hosted journal article supplement (doi:10.1101/rna.051490.115)
Supplement: Supplemental_Figure_Legends.docx [file Supplemental_Figure_Legends.docx]

**Supplementary Figure Legends**

**Supplementary Figure S1.**

**Location of mutations in *rrp6-cat*** (A) Multiple sequence alignment of the conserved DEDD-Y exonuclease domain of Rrp6 in *S. cerevisiae* (budding)*, S. pombe* (fission)*, D. melanogaster* (drosophila)and *H. sapiens* (human). The catalytic (DEDD-Y) residues of Rrp6are highlighted in black rectangles. The amino acids are numbered according to their position in *S. cerevisiae* Rrp6. In *S. pombe* they correspond to D243, E245, D303, Y366, and D370. (B) Homology model of *S. pombe* Rrp6 protein (<http://swissmodel.expasy.org>). The DEDD-Y catalytic residues(depicted in red) lie inside the catalytic core of Rrp6 (labeled).

**Supplementary Figure S2.**

**RNA-Seq scatter plots for transcriptomes of *rrp6* mutants.** The log2 FPKM values of all RNAs determined by RNA-Seq from biological replicates were plotted for each mutant. The correlation was greater than 0.92 for the replicates of all samples.

**Supplementary Figure S3.**

**Rrp6 mRNA targets are better correlated than ncRNA targets.** (A) Scatterplot showing the correlation between replicate measurements of *rrp6-*cat/*rrp6Δ* FPKM ratios for Rrp6 target mRNAs. (B) Histogram showing the distribution of *rrp6-cat*/*rrp6Δ* FPKM ratios of noncoding RNA targets of Rrp6, defined as accumulating significantly by Cuffdiff (*p*<0.01). (C) Scatterplot showing the correlation between replicate measurements of *rrp6-*cat/*rrp6Δ* FPKM ratios for Rrp6 target noncoding RNAs.

**Supplementary Figure S4.**

**Iron response mRNAs are protein dependent targets of Rrp6.** (A) qPCR showing fold accumulation of selective mRNA targets of Mmi1 (*mei4* and *crs1*) and iron homeostasis mRNAs (*str3, fio1, fip1, frp1*), in *rrp6Δ* and *rrp6-cat. adh1* mRNA levels were tested as internal control and labeled as “control”. (B) A purine-rich motif, RARR(A/c)AAAR was enriched in the mRNA sequences of 8 of the 9 iron homeostasis Rrp6 targets. (C) Location of the purine-rich RARR(A/c)AAAR motif in 8 iron homeostasis mRNAs.

**Supplementary Figure S5.**

**Correlation plot of the *dis3-4* mutant transcriptome at 23° and 30°C.** The log2 FPKM values of all RNAs determined by RNA-Seq from *dis3-4* at 23°C and 30°C were plotted. The RNA levels in the *dis3-4* mutant at both temperatures were highly correlated.

**Supplementary Figure S6.**

**Comparison of RNA accumulation of Rrp6 target mRNAs in Rrp6 and Dis3 mutants.** (A)Hierarchical clustering of the log2 (mutant/WT) FPKM ratio of the 157 Rrp6 target mRNAs, in all exonuclease mutants in this study. Mmi1 target RNAs are highlighted in blue and iron homeostasis mRNAs are highlighted in orange. (B) Median log2 FPKM values for Mmi1 target mRNAs and (C) iron response mRNAs in wild type and different exonuclease mutants.
