# Supplementary material
Source: HighWire-hosted journal article supplement (doi:10.1101/rna.051490.115)
Supplement: Supplemental_Table_Rrp6_targets.xlsx [file Supplemental_Table_Rrp6_targets.xlsx]

## Sheet: Rrp6 target mRNA
test_id	WT fpkm	rrp6-del fpkm	rrp6-cat fpkm	dis3-4 30C fpkm	rrp6-cat dis3-4 30C fpkm	del/wt ratio	cat/del ratio	wt/del ratio
SPBC29A10.02	4.70586	627.867	15.902	25.8403	15.2759	133.422	0.025327	0.00749499	Mmi1	121	Protein dependent
SPAC1F8.02c	1	110.071	3.11356	0	25.3647	110.071	0.0282868	0.00908505
SPBC29A10.14	6.58829	388.153	13.1583	18.2725	17.7086	58.9156	0.0338998	0.0169734	Mmi1	36	Activity Dependent
SPAC23D3.10c	28.687	547.095	42.1887	29.8275	31.0151	19.0712	0.077114	0.0524351
SPAC13A11.03	13.185	481.924	41.0193	36.2751	44.0148	36.5509	0.0851157	0.0273591	Mmi1
SPAC1F8.03c	3.75889	84.1416	7.65664	0.991807	31.7378	22.3847	0.0909971	0.0446734	Iron
SPBC16A3.13	13.2678	101.111	10.0502	11.9641	19.1881	7.62078	0.0993978	0.13122
SPAC32A11.01	18.4325	349.93	37.1443	74.2467	58.1758	18.9844	0.106148	0.0526748	Mmi1
SPBC1347.12	4.97569	94.8173	11.7911	19.4281	24.3846	19.0561	0.124356	0.0524766	Mmi1
SPAC57A10.04	8.29462	283.474	41.7091	53.3805	41.2221	34.1756	0.147136	0.0292606	Mmi1
SPBC32H8.11	6.77448	205.174	30.3195	119.139	90.8545	30.2863	0.147775	0.0330182	Mmi1
SPAC1F7.08	3.02123	40.043	6.78641	2.9505	15.8431	13.2539	0.169478	0.0754496	Iron
SPBC1683.09c	10.3231	130.033	24.5485	11.5164	26.0215	12.5963	0.188787	0.0793881	Iron
SPAC1556.06	12.6627	91.6359	17.6216	45.1579	27.079	7.23668	0.1923	0.138185	Mmi1
SPBC2G2.10c	25.4609	83.0366	17.0504	12.7861	17.7829	3.26134	0.205336	0.306623
SPAC27D7.13c	8.7488	88.6906	18.4025	32.298	44.4693	10.1375	0.207491	0.0986441	Mmi1
SPBPB21E7.04c	5.32304	39.6931	8.26614	1.22445	11.8082	7.45685	0.208251	0.134105
SPAC5D6.08c	21.0382	92.4467	19.3786	21.3952	15.7844	4.39423	0.209619	0.227571
SPAC1F7.07c	30.0706	74.0582	16.4623	7.36137	25.4597	2.46281	0.222289	0.40604	Iron
SPAC17A5.04c	20.5398	108.012	24.1531	33.288	30.3821	5.25867	0.223615	0.190162
SPBC725.15	60.8505	380.053	85.0853	133.63	72.2353	6.24568	0.223877	0.160111
SPBC646.17c	4.64234	67.506	16.2695	39.3938	33.7981	14.5414	0.241008	0.0687693	Mmi1
SPBC16C6.14	24.8086	100.496	25.8054	19.9316	26.9708	4.05086	0.25678	0.246861
SPCC1393.07c	7.29311	46.2996	12.3428	18.0768	12.4854	6.3484	0.266585	0.15752	Mmi1
SPBC2D10.06	5.9888	76.9996	20.7588	39.2677	33.0922	12.8573	0.269596	0.077777	Mmi1
SPBC1D7.01	9.7896	94.466	26.2818	56.558	34.0443	9.64963	0.278214	0.103631
SPBP26C9.03c	5.03924	34.9412	9.84031	11.1279	17.2427	6.93382	0.281625	0.144221	Iron
SPAC343.20	40.9941	437.331	123.34	197.305	276.595	10.6681	0.282029	0.093737
SPAC22H10.13	64.6666	587.077	172.541	19.1608	139.295	9.07852	0.293898	0.11015
SPAP27G11.08c	9.31608	50.9243	15.1894	27.2477	37.3343	5.46628	0.298274	0.18294	Mmi1
SPAP8A3.04c	769.207	3207.59	978.669	1104.8	1716.25	4.17	0.30511	0.239808
SPBC4F6.09	31.5743	125.259	38.8851	16.0811	36.866	3.96712	0.310438	0.252072	Iron
SPBC106.02c	27.7173	166.091	52.8051	21.9269	73.9806	5.99232	0.317929	0.16688
SPCC63.04	17.4316	53.9835	17.2742	15.8696	12.4495	3.09688	0.31999	0.322906
SPBC428.08c	8.79314	30.26	9.99995	8.23524	9.5981	3.44132	0.330468	0.290586
SPAC922.09	1	28.0498	9.39128	8.20092	24.667	28.0498	0.334807	0.0356509
SPBC1773.06c	10.7981	62.3964	21.0286	32.119	29.3664	5.77846	0.337016	0.173057
SPAC27D7.03c	5.86218	13.9912	4.7468	4.12513	4.80433	2.38669	0.33927	0.418991
SPAC869.05c	5.17812	14.2452	4.86076	11.9694	8.05846	2.75104	0.341221	0.363499
SPAC24H6.13	12.3685	32.1619	10.9873	21.6008	17.9658	2.60031	0.341625	0.38457
SPCC1672.09	58.6484	127.921	44.3485	30.8391	34.3232	2.18115	0.346687	0.458474
SPBC19C7.04c	104.81	264.708	93.435	108.959	134.276	2.5256	0.352974	0.395946
SPBC16E9.16c	32.9875	112.772	39.9195	37.9259	69.3807	3.41863	0.353984	0.292515
SPCC663.06c	6.55595	40.7867	14.7283	14.281	42.1703	6.22133	0.361105	0.160737
SPBC646.06c	43.47	124.894	46.2229	52.6407	39.5042	2.87311	0.370097	0.348055
SPBC1711.15c	20.8676	210.11	79.3632	209.976	272.265	10.0687	0.377722	0.0993175
SPAC4G9.07	4.74796	17.4651	6.61445	3.65105	7.07387	3.67844	0.378724	0.271854
SPBC3H7.09	32.8998	87.507	34.2091	35.0567	25.5349	2.6598	0.39093	0.375968
SPAC18B11.04	54.032	139.77	55.3243	59.4178	61.9257	2.5868	0.395824	0.386578
SPCC1020.03	13.0971	46.1479	18.4507	28.2645	34.7514	3.52352	0.399817	0.283807	Iron
SPAC23C4.07	8.75579	84.1421	33.8078	46.4547	57.0729	9.60988	0.401794	0.10406	Mmi1
SPCC338.12	53.5957	208.336	86.7999	77.956	89.204	3.88718	0.416634	0.257256
SPAC6G10.03c	15.2597	80.544	33.7242	17.3253	64.008	5.27822	0.418705	0.189458
SPCC965.07c	23.6995	399.96	170.11	69.2006	275.79	16.8763	0.425318	0.0592547
SPCC1183.09c	52.8493	145.281	62.7568	43.7527	58.5981	2.74897	0.431968	0.363773
SPAC19G12.07c	25.8498	112.905	48.8398	94.7049	95.1389	4.36773	0.432574	0.228952
SPCC1682.08c	30.937	68.9586	30.1774	59.1926	90.9958	2.229	0.437616	0.448631
SPAC23G3.02c	10.9683	24.0759	10.6518	13.1228	12.7415	2.19504	0.442428	0.455572	Iron
SPBC947.05c	5.20688	21.3155	9.51161	8.91172	10.1524	4.09372	0.44623	0.244277	Iron
SPCC1393.12	59.6058	134.228	60.3436	66.1428	87.7772	2.25193	0.44956	0.444064
SPCC11E10.09c	10.7281	30.047	13.856	11.5614	9.04046	2.80077	0.461144	0.357045
SPAC12B10.16c	29.3051	55.949	26.1774	31.7802	23.2764	1.90919	0.46788	0.523782
SPBC17D11.08	46.4295	84.1721	39.4658	38.2129	33.6927	1.8129	0.46887	0.551602
SPCC830.09c	34.3613	95.6972	44.911	74.7867	55.121	2.78503	0.469303	0.359063
SPAC17A5.18c	15.9513	62.4874	29.5279	63.3051	54.117	3.91739	0.472542	0.255272	Mmi1
SPAC22F3.03c	8.4317	27.4516	13.1509	19.6134	20.6089	3.25576	0.479058	0.307148
SPBP8B7.24c	246.618	541.456	261.485	135.028	154.847	2.19553	0.482929	0.455472
SPBC32H8.07	7.50947	24.9096	12.1666	5.54468	25.6296	3.31709	0.48843	0.301469
SPAPB24D3.08c	47.5747	169.754	83.7148	77.3866	88.3202	3.56816	0.493154	0.280257
SPAC15E1.02c	22.4875	68.5929	34.0897	73.3708	61.8091	3.05027	0.496986	0.32784
SPAC4F10.12	29.2388	72.7373	36.1768	69.9673	61.2433	2.4877	0.497362	0.401978
SPAC4H3.08	18.9463	44.7499	22.4131	23.7709	16.9043	2.36193	0.500853	0.423382
SPAC22G7.07c	8.13798	20.6169	10.3286	10.0815	8.13079	2.53342	0.500976	0.394724
SPAC16A10.04	14.8513	39.9695	20.4424	35.1907	32.1411	2.69131	0.51145	0.371566
SPBC337.08c	27.2397	85.2403	43.7292	301.948	46.0892	3.12927	0.513011	0.319564
SPAPB17E12.10c	15.8007	41.0861	21.0982	22.4735	18.4043	2.60027	0.513512	0.384575
SPCC1620.02	6.65851	23.5365	12.654	2.23605	8.81491	3.5348	0.537633	0.282901
SPAC8C9.16c	41.0956	76.3911	41.885	23.7832	30.7427	1.85886	0.548297	0.537963
SPBC119.03	68.0114	158.847	87.5139	85.6271	81.6442	2.33559	0.550932	0.428157
SPCC1020.13c	19.3286	45.0557	24.9247	20.8691	27.6692	2.33104	0.553197	0.428993
SPBC713.11c	205.965	500.92	279.308	271.056	410.744	2.43206	0.55759	0.411173
SPAC3G9.11c	15.1685	42.0115	23.5686	32.0811	51.8833	2.76965	0.561004	0.361056
SPCC965.06	33.9366	89.4723	50.5622	44.5702	87.2271	2.63645	0.565116	0.379297
SPBC660.06	52.0977	146.583	83.5513	67.635	128.147	2.81362	0.569993	0.355414
SPBC1773.03c	8.9323	22.6647	12.9775	20.806	23.9637	2.53739	0.572586	0.394106
SPAC1F7.12	31.9363	70.6649	41.2712	44.8318	54.001	2.21268	0.584041	0.45194
SPAC4A8.04	38.3686	105.819	61.8684	52.6155	73.4568	2.75796	0.584662	0.362587
SPBC29A3.01	24.8255	47.7472	28.0697	48.2357	69.39	1.92331	0.587882	0.519936
SPBC4C3.04c	14.6032	53.4837	31.6298	50.8337	41.3005	3.66246	0.591391	0.27304
SPAC6B12.05c	60.3066	128.394	76.4065	86.513	96.6075	2.12902	0.595094	0.4697
SPBC1604.01	16.33	38.4127	22.8639	43.9344	38.704	2.35228	0.595217	0.42512
SPBC337.12	53.0523	104.947	62.8982	60.8892	65.5624	1.97818	0.599333	0.505515
SPAC3A12.08	20.1723	53.2646	31.9544	36.0243	57.7396	2.64048	0.599918	0.378719
SPAC20G8.10c	17.4545	40.1269	24.1804	15.6693	27.0953	2.29894	0.602598	0.434983
SPBC23G7.10c	14.1361	130.073	78.6882	41.2685	8.45192	9.20148	0.604954	0.108678
SPAC1002.19	14.686	42.2572	25.6549	12.7374	66.0254	2.87738	0.607113	0.347538
SPBC29A10.12	259.426	505.741	312.371	207.917	244.376	1.94946	0.61765	0.512962
SPAC222.04c	119.324	254.515	158.915	194.302	179.824	2.13297	0.624384	0.468829
SPAC20G4.03c	9.78962	21.7922	13.6349	14.0151	11.0689	2.22605	0.625678	0.449226
SPAC29E6.08	131.172	415.809	263.07	389.584	505.161	3.16995	0.63267	0.315462
SPBC405.04c	111.505	222.382	141.218	135.597	131.025	1.99437	0.635024	0.501412
SPAC25H1.05	23.5654	70.844	45.4367	42.9854	45.9311	3.00627	0.641363	0.332638
SPAC17G8.11c	17.5038	39.3181	25.3534	26.4043	42.1857	2.24626	0.644828	0.445184
SPAC16E8.16	24.2712	146.306	95.9678	145.799	203.912	6.02797	0.655939	0.165893
SPCC417.11c	7.94517	24.6628	16.2043	25.6713	17.6469	3.10412	0.657034	0.322152
SPCC613.11c	14.8254	40.6976	26.8233	16.7958	23.0262	2.74513	0.659088	0.364282
SPAC22F8.05	22.1422	42.5319	28.1047	20.7433	47.1749	1.92085	0.660791	0.520602
SPAC1527.02	58.1127	113.284	75.7223	90.9905	68.9301	1.94938	0.668429	0.512982
SPAC19G12.09	217.036	586.108	394.743	189.832	356.329	2.70051	0.673499	0.3703
SPBC1271.09	7.827	25.9844	17.5315	32.0057	79.6306	3.31984	0.674693	0.301219
SPCC4G3.10c	13.8778	39.6267	27.3453	32.5721	72.0266	2.8554	0.690073	0.350213
SPAC2C4.15c	31.7251	67.0553	46.4996	41.8148	69.2742	2.11364	0.693452	0.473118
SPAC18B11.06	33.6869	78.4473	54.7519	66.3958	124.926	2.32872	0.697945	0.429421
SPAC19G12.11	53.9314	114.524	80.1996	91.9871	63.7393	2.12351	0.700286	0.470918
SPAC3C7.05c	14.5974	39.642	27.7683	25.4868	27.4543	2.71569	0.700477	0.368231
SPAC23H3.02c	29.7871	179.935	127.897	122.383	146.63	6.0407	0.710796	0.165544
SPAC13G6.12c	9.5761	28.9957	20.6682	19.6753	24.994	3.02792	0.712802	0.330259
SPAC1250.05	154.45	576.993	431.089	548.637	426.132	3.73579	0.74713	0.267681
SPBC1709.11c	76.2558	152.217	115.068	83.4247	87.6307	1.99614	0.755947	0.500968
SPBC215.11c	31.015	195.286	147.649	39.8164	217.862	6.2965	0.756065	0.158818
SPAC29B12.13	77.4753	162.197	123.7	259.443	154.48	2.09353	0.762653	0.477662
SPAC4F8.01	108.017	223.991	173.016	145.089	116.273	2.07366	0.772424	0.482238
SPAC29E6.07	1	15.8747	12.3369	5.04672	15.4835	15.8747	0.777142	0.0629933
SPBC3E7.02c	255.144	541.99	424.477	912.572	372.939	2.12425	0.783182	0.470754
SPAC1610.01	30.1959	68.2591	53.5558	62.0188	78.2738	2.26054	0.784596	0.442372
SPAC23D3.12	22.8348	47.4687	37.3399	14.5193	38.4272	2.07879	0.786621	0.48105
SPBC577.10	150.348	265.54	211.86	257.941	226.505	1.76617	0.797846	0.566197
SPAC9E9.12c	23.5595	85.7141	68.4141	98.9305	98.2252	3.6382	0.798166	0.274861
SPAC19G12.13c	20.473	43.0388	34.4617	33.1025	22.1392	2.10222	0.800712	0.475687
SPCC1393.04	18.7664	46.1835	37.0506	38.7868	37.5409	2.46097	0.802248	0.406344
SPCC1840.09	38.0286	74.2624	60.1628	62.8114	52.4418	1.9528	0.810138	0.512084
SPAC6B12.06c	13.5929	46.6305	38.388	46.641	40.4206	3.4305	0.823238	0.291502
SPBC12C2.04	100.457	209.655	172.766	116.208	97.0423	2.087	0.824049	0.479156
SPAC27D7.09c	121.228	542.661	452.34	117.49	280.883	4.47637	0.833559	0.223395
SPBC1271.10c	22.9744	44.9132	37.4839	38.8039	80.4239	1.95492	0.834585	0.511529
SPBC543.06c	54.3123	101.954	85.1184	90.0904	96.8302	1.87718	0.834871	0.532714
SPCC18B5.01c	19.745	54.6384	45.6964	48.7237	31.0169	2.7672	0.836342	0.361376
SPBC3B9.17	48.6932	105.72	88.5088	57.5256	48.7809	2.17115	0.8372	0.460586
SPBP8B7.16c	126.336	222.892	186.876	247.381	506.248	1.76428	0.838415	0.566804
SPBC2A9.02	55.4092	142.15	119.723	106.733	129.623	2.56546	0.84223	0.389794
SPAC19A8.06	37.4472	73.9205	62.9356	56.7532	53.8258	1.97399	0.851396	0.506587
SPCC11E10.07c	73.2534	137.239	124.721	117.784	121.94	1.87348	0.908787	0.533765
SPAC22F3.08c	34.0866	68.2621	62.6745	69.1486	114.089	2.00261	0.918145	0.499349
SPCC330.06c	83.1715	255.002	235.145	287.17	296.702	3.06598	0.92213	0.32616
SPAC1705.02	215.853	480.017	450.705	433.846	359.09	2.22381	0.938935	0.449678
SPAC25B8.01	84.8228	161.96	152.3	130.314	152.679	1.90939	0.940356	0.523727
SPAC20G4.06c	291.498	634.413	620.103	755.977	559.537	2.17639	0.977444	0.459477
SPCPB16A4.07	252.418	453.58	449.623	277.629	342.242	1.79694	0.991276	0.556502
SPAC1006.01	42.1214	117.735	117.984	84.1597	98.123	2.79514	1.00211	0.357764
SPAC513.02	19.4657	47.2553	49.4898	27.8105	30.206	2.42762	1.04729	0.411926
SPBC1652.01	11.2789	28.3863	31.4614	54.3343	49.2891	2.51676	1.10833	0.397336
SPAC4F10.20	162.576	367.202	466.685	650.436	294.008	2.25865	1.27092	0.442743
SPAC977.14c	335.398	860.412	1123.69	724.752	1193.95	2.56535	1.30599	0.389811
SPAC4G8.02c	125.787	257.973	342.109	395.157	238.83	2.05087	1.32614	0.487598
SPAC1006.03c	61.2668	138.679	196.053	104.149	110.16	2.26353	1.41372	0.441789
SPCC1393.10	50.6119	96.971	151.613	351.891	262.815	1.91597	1.56349	0.521928
SPAC26F1.07	291.828	568.586	921.987	329.408	305.156	1.94836	1.62154	0.513252

## Sheet: Rrp6 target ncRNA
test_id	WT fpkm	rrp6-del fpkm	rrp6-cat fpkm	dis3-4 30C fpkm	rrp6-cat dis3-4 30C fpkm	cat/del ratio
SPATRNAILE.02	1	74.4569	111.374	32.6404	81.8914	1.49582
SPBTRNAGLY.09	1	78.914	16.6984	0	6.8795	0.211603
SPNCRNA.1415	1	58.9227	25.9999	17.6815	88.6184	0.441254
SPNCRNA.173	1	158.105	21.213	100.365	57.8436	0.13417
SPNCRNA.209	1	20.0412	25.0093	59.528	29.6089	1.24789
SPNCRNA.220	1	91.249	15.9233	25.5531	4.11611	0.174504
SPNCRNA.281	1	10.7081	7.7433	14.1474	5.26189	0.723122
SPNCRNA.392	1	25.8189	15.712	41.2701	24.3901	0.608546
SPNCRNA.603	1	10.9804	1.23727	5.26188	4.95578	0.11268
SPSNORNA.53	1	288.905	27.5377	0	67.9745	0.0953175
SPNCRNA.901	51.2888	4496.88	1868.13	3719.84	2450.84	0.415428
SPSNORNA.32	97.1701	7795.34	2568.01	3549.59	3115.46	0.329429
SPNCRNA.1511	60.9936	3440.4	1723.1	3297.66	2426.65	0.500843
SPNCRNA.942	48.1448	2419.01	885.086	2549.66	1523.9	0.365888
SPNCRNA.965	40.8754	1954.2	1454.09	991.081	1308.1	0.744085
SPNCRNA.507	371.616	15032.5	12290.3	827.714	1878.33	0.817582
SPNCRNA.1436	22.6047	616.23	651.085	947.517	656.929	1.05656
SPNCRNA.893	34.6164	912.561	788.096	1417.61	964.571	0.863609
SPNCRNA.445	58.6414	1439.78	1046.05	916.433	962.1	0.726535
SPSNORNA.35	239.186	5073.34	2748.8	3841.92	2681.36	0.541813
SPNCRNA.1444	107.572	1532.56	1027.29	1119.75	1169.36	0.67031
SPNCRNA.727	29.5123	394.496	267.364	289.403	278.85	0.677736
SPNCRNA.1397	8.69553	101.737	16.585	37.482	28.9098	0.163018
SPNCRNA.475	138.493	1374.9	3166.53	4807.34	2512.12	2.3031
SPNCRNA.1696	27.2878	249.552	156.784	392.201	249.474	0.628262
SPNCRNA.906	137.334	1171.8	1387.01	1903.81	1233.84	1.18366
SPNCRNA.1153	18.6153	121.62	76.7254	29.0474	105.055	0.630862
SPNCRNA.659	27.7259	181.665	66.7942	52.7112	73.7379	0.367678
SPNCRNA.1236	44.4797	265.652	176.327	221.511	215.749	0.663752
SPNCRNA.584	18.5947	106.422	24.3803	26.0214	37.3918	0.229091
SPNCRNA.793	162.851	909.057	427.761	374.004	464.626	0.470555
SPNCRNA.605	18.3839	95.6026	26.897	21.1729	75.7966	0.281342
SPNCRNA.1213	16.523	76.3232	37.6246	33.4846	82.9581	0.492964
SPNCRNA.1095	658.358	2122.55	6073.27	2581.32	4468.36	2.86131
SPNCRNA.844	45.5884	119.744	84.9141	122.834	110.187	0.70913
SPNCRNA.348	1	16.0009	10.8619	12.3062	5.45602	0.678832
SPNCRNA.29	16.4704	235.069	39.3853	85.8767	31.1453	0.167548
SPNCRNA.267	1	14.163	10.6197	5.31325	13.8641	0.749822
SPNCRNA.723	16.3021	281.425	75.4668	226.521	151.9	0.26816
SPNCRNA.667	44.9389	228.156	195.886	243.765	201.302	0.858562
SPNCRNA.388	52.7493	137.939	73.3607	72.9229	4.65969	0.531834
SPSNORNA.40	43.8525	2906.3	514.332	1252.93	650.893	0.176971
SPNCRNA.1238	14.2495	233.651	14.8346	17.9858	14.3275	0.0634904
SPNCRNA.713	19.4175	58.1367	57.8963	90.8646	69.2819	0.995865
SPNCRNA.118	1	65.3849	1	0	0	0.0152941
SPNCRNA.1580	17.8126	56.304	32.073	30.073	33.7437	0.56964
SPNCRNA.710	28.1433	73.1324	32.7397	32.4919	38.5029	0.447677
SPNCRNA.1615	89.3605	179.955	135.881	171.179	124.303	0.755083
SPNCRNA.1483	18.2381	82.9652	92.4308	38.3793	76.0406	1.11409
SPNCRNA.771	28.0473	68.0655	40.5837	93.4301	62.6649	0.596245
SPNCRNA.1197	16.8651	1180.45	61.0065	207.483	138.68	0.0516807
SPSNORNA.46	39.2	814.008	171.59	210.881	166.561	0.210796
SPSNORNA.37	51.7046	4482.5	1959.63	3785.72	2590.3	0.437173
SPNCRNA.1435	6.55797	34.1004	19.2115	17.4368	72.622	0.56338
SPBTRNAASN.04	1	45.5228	57.4468	14.5559	23.5199	1.26193
SPNCRNA.989	6.96141	32.6525	10.7632	12.3337	13.5492	0.329628
SPNCRNA.510	78.073	3793.02	1618.39	2597.96	2453.14	0.426676
SPNCRNA.316	28.1636	87.1004	118.867	91.0759	88.8799	1.36471
SPRRNA.15	118.413	927.378	1682.59	317.106	712.781	1.81435
SPNCRNA.1651	23.9758	2098.28	963.321	1611.81	1274.85	0.4591
SPNCRNA.606	5.23823	306.695	10.7462	8.00277	10.1076	0.0350389
SPNCRNA.708	20.5355	47.3711	54.1032	71.2373	60.8255	1.14211
SPNCRNA.103	9.68615	2522.37	122.756	285.354	205.25	0.0486669
SPSNORNA.21	52.7291	2359.63	366.599	44.0297	166.026	0.155363
SPNCRNA.1042	45.0997	190.056	166.723	114.548	146.011	0.877231
SPNCRNA.1293	26.6722	81.7151	61.1697	171.632	116.985	0.748573
SPNCRNA.751	13.21	113.172	59.6301	140.35	109.068	0.526898
SPNCRNA.1663	22.338	109.557	32.7046	27.7397	25.1051	0.298517
SPNCRNA.1394	19.4365	471.118	274.768	277.718	304.869	0.583225
SPNCRNA.666	25.9089	56.3303	36.8609	80.9868	64.7696	0.654371
SPNCRNA.301	14.2231	77.5628	49.5464	81.1005	71.4203	0.638791
SPNCRNA.648	51.3095	178.527	122.308	255.288	262.455	0.685095
SPNCRNA.58	52.8449	146.161	90.5095	148.556	101.474	0.619245
SPNCRNA.629	171.564	320.786	231.27	230.119	201.642	0.720948
SPSNORNA.44	41.2338	2599.8	1475.5	2676.06	814.128	0.567544
SPNCRNA.762	4.63809	48.9647	9.31705	4.88531	7.3437	0.190281
SPSNORNA.13	59.7692	3183.24	1535.22	38.9318	779.599	0.482282
SPSNORNA.36	38.662	1992.45	958.849	1263.64	1277	0.481241
SPNCRNA.513	10.849	139.263	125.388	122.113	80.525	0.900368
SPNCRNA.1469	9.09188	20.7145	16.4889	24.7085	27.995	0.796008
SPNCRNA.1578	215.021	412.23	243.493	416.363	493.012	0.590673
SPNCRNA.1114	31.8242	663.178	534.93	862.315	773.189	0.806616
SPATRNAALA.06	1	29.4588	50.7008	12.9775	16.3696	1.72107
SPNCRNA.1685	20.6762	91.7353	22.485	22.4593	25.6595	0.245107
SPSNORNA.42	62.242	1576.51	995.502	968.862	492.356	0.631459
SPNCRNA.760	7.69014	28.1638	14.0872	24.0213	24.4806	0.500188
SPNCRNA.1094	200.782	419.776	800.764	617.428	1037.39	1.9076
SPNCRNA.692	100.514	182.063	150.666	162.033	155.203	0.827549
SPNCRNA.877	10.2507	55.0388	30.1007	94.2317	175.275	0.5469
SPNCRNA.1356	7.46786	57.5226	17.9247	27.0485	24.3628	0.311611
SPNCRNA.1584	19.7227	47.999	29.2964	34.9645	25.5071	0.610354
SPNCRNA.411	8.23363	56.0079	32.8403	20.2397	39.9709	0.586351
SPNCRNA.412	24.8422	69.8855	62.615	72.1408	37.9303	0.895966
SPNCRNA.1588	14.7677	54.0141	17.8349	12.8323	11.6079	0.33019
SPATRNALEU.01	1	22.8214	31.3633	11.4589	30.0427	1.37429
SPNCRNA.1198	5.47625	39.314	11.8025	15.2826	14.9613	0.300211
SPNCRNA.243	6.60476	44.7638	26.6164	57.7745	37.7298	0.594597
SPNCRNA.431	10.0338	65.4595	33.8159	38.3729	38.9691	0.516593
SPNCRNA.1461	82.1713	172.809	120.951	126.912	120.971	0.699911
SPNCRNA.1402	28.0349	102.684	75.5162	101.319	86.905	0.735423
SPNCRNA.427	27.607	81.7067	81.6523	83.2021	95.0266	0.999334
SPNCRNA.1299	20.1942	58.8927	79.0069	32.7661	204.069	1.34154
SPNCRNA.1129	22.7209	52.6025	49.7203	69.1671	39.345	0.945208
