# Supplementary material
Source: HighWire-hosted journal article supplement (doi:10.1101/rna.051490.115)
Supplement: Supplemental_Table_S1.docx [file Supplemental_Table_S1.docx]

**Supplementary Table S1. Summary of expression and functional categories of Rrp6 mRNA targets**

**A. Protein dependent mRNA targets**

|  |  |  |  |
| --- | --- | --- | --- |
|  |  |  |  |
|  |  |  |  |
|  |  |  |  |
|  |  |  |  |
|  |  |  |  |
|  |  |  |  |
|  |  |  |  |
|  |  |  |  |
|  |  |  |  |
|  |  |  |  |
|  |  |  |  |
|  |  |  |  |
|  |  |  |  |
|  |  |  |  |
|  |  |  |  |
|  |  |  |  |
|  |  |  |  |
|  |  |  |  |
|  |  |  |  |
|  |  |  |  |
|  |  |  |  |
|  |  |  |  |
|  |  |  |  |
|  |  |  |  |
|  |  |  |  |
|  |  |  |  |
|  |  |  |  |
|  |  |  |  |
|  |  |  |  |
|  |  |  |  |
|  |  |  |  |
|  |  |  |  |
|  |  |  |  |
|  |  |  |  |
|  |  |  |  |
|  |  |  |  |
|  |  |  |  |
|  |  |  |  |
|  |  |  |  |
|  |  |  |  |
|  |  |  |  |
|  |  |  |  |
|  |  |  |  |
|  |  |  |  |
|  |  |  |  |
|  |  |  |  |
|  |  |  |  |
|  |  |  |  |
|  |  |  |  |
|  |  |  |  |
|  |  |  |  |
|  |  |  |  |
|  |  |  |  |
|  |  |  |  |
|  |  |  |  |
|  |  |  |  |
|  |  |  |  |
|  |  |  |  |
|  |  |  |  |
|  |  |  |  |
|  |  |  |  |
|  |  |  |  |
|  |  |  |  |
|  |  |  |  |
|  |  |  |  |
|  |  |  |  |
|  |  |  |  |
|  |  |  |  |
|  |  |  |  |
|  |  |  |  |
|  |  |  |  |
|  |  |  |  |
|  |  |  |  |
|  |  |  |  |
|  |  |  |  |
|  |  |  |  |
|  |  |  |  |
|  |  |  |  |
|  |  |  |  |
|  |  |  |  |
|  |  |  |  |
|  |  |  |  |
|  |  |  |  |
|  |  |  |  |
|  |  |  |  |
|  |  |  |  |
|  |  |  |  |
|  |  |  |  |
|  |  |  |  |
|  |  |  |  |
|  |  |  |  |
|  |  |  |  |
|  |  |  |  |
|  |  |  |  |
|  |  |  |  |
|  |  |  |  |
|  |  |  |  |
|  |  |  |  |
|  |  |  |  |
|  |  |  |  |
|  |  |  |  |
|  |  |  |  |
|  |  |  |  |
|  |  |  |  |
|  |  |  |  |
|  |  |  |  |
|  |  |  |  |
|  |  |  |  |
|  |  |  |  |
|  |  |  |  |
|  |  |  |  |
|  |  |  |  |
|  |  |  |  |
|  |  |  |  |
|  |  |  |  |
|  |  |  |  |
|  |  |  |  |
|  |  |  |  |
|  |  |  |  |
|  |  |  |  |

**B. Activity dependent mRNA targets of Rrp6**

| **SYSTEMATIC ID** | **Wt/rrp6-del ratio** | **Cat/del ratio** |
| --- | --- | --- |
| SPAC29B12.13 | 0.478 | 0.763 |
| SPAC4F8.01 | 0.482 | 0.772 |
| SPAC29E6.07 | 0.063 | 0.777 |
| SPBC3E7.02c | 0.471 | 0.783 |
| SPAC1610.01 | 0.442 | 0.785 |
| SPAC23D3.12 | 0.481 | 0.787 |
| SPBC577.10 | 0.566 | 0.798 |
| SPAC9E9.12c | 0.275 | 0.798 |
| SPAC19G12.13c | 0.476 | 0.801 |
| SPCC1393.04 | 0.406 | 0.802 |
| SPCC1840.09 | 0.512 | 0.810 |
| SPAC6B12.06c | 0.292 | 0.823 |
| SPBC12C2.04 | 0.479 | 0.824 |
| SPAC27D7.09c | 0.223 | 0.834 |
| SPBC1271.10c | 0.512 | 0.835 |
| SPBC543.06c | 0.533 | 0.835 |
| SPCC18B5.01c | 0.361 | 0.836 |
| SPBC3B9.17 | 0.461 | 0.837 |
| SPBP8B7.16c | 0.567 | 0.838 |
| SPBC2A9.02 | 0.390 | 0.842 |
| SPAC19A8.06 | 0.507 | 0.851 |
| SPCC11E10.07c | 0.534 | 0.909 |
| SPAC22F3.08c | 0.499 | 0.918 |
| SPCC330.06c | 0.326 | 0.922 |
| SPAC1705.02 | 0.450 | 0.939 |
| SPAC25B8.01 | 0.524 | 0.940 |
| SPAC20G4.06c | 0.459 | 0.977 |
| SPCPB16A4.07 | 0.557 | 0.991 |
| SPAC1006.01 | 0.358 | 1.002 |
| SPAC513.02 | 0.412 | 1.047 |
| SPBC1652.01 | 0.397 | 1.108 |
| SPAC4F10.20 | 0.443 | 1.271 |
| SPAC977.14c | 0.390 | 1.306 |
| SPAC4G8.02c | 0.488 | 1.326 |
| SPAC1006.03c | 0.442 | 1.414 |
| SPCC1393.10 | 0.522 | 1.563 |
| SPAC26F1.07 | 0.513 | 1.622 |
