# Supplementary material
Source: HighWire-hosted journal article supplement (doi:10.1101/rna.051490.115)
Supplement: Supplemental_Table_S2.docx [file Supplemental_Table_S2.docx]

**Supplementary Table S2. Strains used in this study**

F368 (CHP1364): *h- leu1-32 lys7-2 ura5-14*

F367 (CHP1365): *h+ leu1-32 lys7-2 ura5-14*

JLP 1704: *h- rrp6::ura5-lys7 leu1-32 lys7-2 ura5-14*

JLP1708: *h- rrp6-cat (D243A, E245A, D303A, Y366A, D370A) leu1-32 lys7-2 ura5-14*

JT449: *h90 dis3-4 ade6-M216 leu1-32*

JLP1863: *dis3-4 rrp6-cat leu1-32 ura? his? ade?*

JLP1840: *h- rrp6-TAP>>KanMX leu1-32 lys7-2 ura5-14*

JLP1841: *h- rrp6-cat-TAP>>KanMX leu1-32 lys7-2 ura5-14*
