# Supplementary material
Source: HighWire-hosted journal article supplement (doi:10.1101/rna.051490.115)
Supplement: Supplemental_Table_S3.docx [file Supplemental_Table_S3.docx]

**Supplementary Table S3. Primers used in this study**

| **Primer** | **Sequence** |
| --- | --- |
| **Construction of *rrp6::ura5-lys7*** | |
| rrp6-exon2F | CCAGGGAGTTTGTGTGGTCT |
| rrp6-exon2R | ACGGAATCTCTCCAATCGTG |
| ura5-lys7-F | CTCATTTGGCTTGGTACTGCTG |
| ura5-lys7-R | ATTACAAGTCGTTCAATGTCTCCC |
| rrp6-ura5-lys7-F | CCAGGGAGTTTGTGTGGTCTTGGAAGTTAACTGAAAAACCACATTCGTTAGTACCGCTCTCATTTGGCTTGGTACTGCTG |
| rrp6-ura5-lys7-R | ACGGAATCTCTCCAATCGTGCAGTGCTCGATAAATCATCAAAGCTTCCCGTCCAATATTACAAGTCGTTCAATGTCTCCC |
| rrp6-5’-ura5-lys7-R | CAGCAGTACCAAGCCAAATGAGACCCAGATAGGTTCTGTTTCGTC |
| rrp6-5’-ura5-lys7-F | GACGAAACAGAACCTATCTGGGTCTCATTTGGCTTGGTACTGCTG |
| rrp6-3’-ura5-lys7-R | CAGCTGATTTTGATATGAGTTCAATTACAAGTCGTTCAATGTCTCCC |
| rrp6-3’-ura5-lys7-F | GGGAGACATTGAACGACTTGTAATTGAACTCATATCAAAATCAGCTG |
| **Site-directed mutagenesis to make *rrp6-cat*** | |
| rrp6-Y366A-F | GTCCTTTGCCTCGGGAAATGTTAAAAGCTGCTCAATCTGATACGC |
| rrp6-Y366A-R | GCGTATCAGATTGAGCAGCTTTTAACATTTCCCGAGGCAAAGGAC |
| rrp6-E245A-F | CAAAGAAATAGCCGTTGATCTTGCACACCATGATTACAGATCATTTA |
| rrp6-E245A-R | TAAATGATCTGTAATCATGGTGTGCAAGATCAACGGCTATTTCTTTG |
| rrp6-D303A-F | TTTTCATGGTGCAACTATGGCTATCATTTGGCTGCAAAGAG |
| rrp6-D303A-R | CTCTTTGCAGCCAAATGATAGCCATAGTTGCACCATGAAAA |
| rrp6-D370A-F | GGAAATGTTAAAATATGCTCAATCTGCTACGCATTATTTGTTATATATTTGGG |
| rrp6-D370A-R | CCCAAATATATAACAAATAATGCGTAGCAGATTGAGCATATTTTAACATTTCC |
| rrp6-D243A-F | CAGCAAAGAAATAGCCGTTGCTCTTGAACACCATGATTACA |
| rrp6-D243A-R | TGTAATCATGGTGTTCAAGAGCAACGGCTATTTCTTTGCTG |
